# Supplementary material for: Association of household income and adverse outcomes in patients with atrial fibrillation
Source: PubMed Central journal article supplement — Heart. 2020 Mar 6;106(21):1679–85. doi: 10.1136/heartjnl-2019-316065 (PMC7483243; doi:10.1136/heartjnl-2019-316065), 2020-03-06
Supplement: NIHMS1565714-supplement-Supp1.pdf [file NIHMS1565714-supplement-Supp1.pdf]

# Association of Household Income and Adverse Outcomes in Patients with Atrial Fibrillation

## SUPPLEMENTARY MATERIAL

Anna R. LaRosa, MD<sup>1</sup>; J’Neka S. Claxton, MPH<sup>2</sup>; Wesley T. O’Neal, MD, MPH<sup>3</sup>; Pamela L. Lutsey, PhD<sup>4</sup>; Lin Y. Chen, MD, MS<sup>5</sup>; Lindsay G.S. Bengtson, PhD<sup>6</sup>; Alanna M. Chamberlain, PhD<sup>7</sup>; Alvaro Alonso MD, PhD<sup>2</sup>; Jared W. Magnani MD, MSc<sup>1,8</sup>

### Affiliations

- 1 - Department of Medicine, University of Pittsburgh Medical Center, Pittsburgh, PA
- 2 - Department of Epidemiology, Rollins School of Public Health, Emory University, Atlanta, GA
- 3 - Division of Cardiology, Department of Medicine, School of Medicine, Emory University, Atlanta, GA
- 4 - Division of Epidemiology and Community Health, School of Public Health, University of Minnesota, Minneapolis, MN
- 5 - Cardiovascular Division, Department of Medicine, University of Minnesota Medical School, Minneapolis, MN
- 6 - Health Economics and Outcomes Research, Life Sciences, Optum, Eden Prairie, MN
- 7 - Department of Health Sciences Research, Mayo Clinic, Rochester, MN
- 8 - Division of Cardiology, UPMC Heart and Vascular Institute, University of Pittsburgh, Pittsburgh, PA

### Funding:

Research reported in this publication was supported by the NHLBI/NIH award number R01HL122200 and R01HL143010. The content is solely the responsibility of the authors and does not necessarily represent the official views of the National Institutes of Health. This work was supported by Grant 2015084 from the Doris Duke Charitable Foundation, New York, NY, and by American Heart Association grant 16EIA26410001.

### Disclosures:

Dr. Lindsay Bengtson is an employee of Optum©. There are no other author disclosures.

### Address for correspondence:

Jared W Magnani, MD, MSc  
Department of Medicine, Division of Cardiology, UPMC Heart and Vascular Institute  
University of Pittsburgh  
200 Lothrop Street  
Pittsburgh, PA 15213  
Phone: 412-692-4942  
Fax: 412-692-4944  
Email: [magnanij@pitt.edu](mailto:magnanij@pitt.edu)

---

**Supplementary Table 1.** ICD-9-CM Codes used for comorbidity and outcome ascertainment.

---

| <b>Condition</b>                      | <b>ICD-9-CM codes</b>                                                                                                                                                                                                                        |
|---------------------------------------|----------------------------------------------------------------------------------------------------------------------------------------------------------------------------------------------------------------------------------------------|
| Heart failure                         | 398.91, 402.01 <sup>†</sup> , 402.11 <sup>†</sup> , 402.91 <sup>†</sup> , 404.01 <sup>†</sup> , 404.03 <sup>†</sup> , 404.11 <sup>†</sup> , 404.13 <sup>†</sup> , 404.91 <sup>†</sup> , 404.93 <sup>†</sup> , 425.4, 425.9, 428 <sup>†</sup> |
| Ischemic stroke                       | 433, 434 <sup>†</sup> , 435, 436 <sup>†</sup> , 437, 438                                                                                                                                                                                     |
| Coronary Heart Disease                | 410, 411, 412, 413, 414                                                                                                                                                                                                                      |
| Hypertension                          | 401, 402, 403, 404, 405                                                                                                                                                                                                                      |
| Diabetes                              | 250                                                                                                                                                                                                                                          |
| Chronic Obstructive Pulmonary Disease | 490-505, 416.8, 416.9, 506.4, 508.1, 508.8                                                                                                                                                                                                   |
| Chronic Kidney Disease                | 403.01, 403.11, 403.91, 404.02, 404.03, 404.12, 404.13, 404.92, 404.93, 582, 583.0, 583.1, 583.2, 583.3, 583.4, 583.5, 583.6, 583.7, 585, 586, 588.0, V42.0, V45.1, V56                                                                      |

---

ICD-9-CM indicates International Classification of Diseases, Ninth Revision, Clinical Modification. <sup>†</sup>Codes used to define main outcome variables

---

**Supplementary Table 2A.** Summary of events, person-time (years), and hazard ratios with 95% confidence intervals for cardiovascular events, by income category for study patients identified as white race.

|                               | <b>Income</b>     |                   |                   |                   |                |
|-------------------------------|-------------------|-------------------|-------------------|-------------------|----------------|
|                               | <b>&lt;\$40K</b>  | <b>\$40-59K</b>   | <b>\$60-74K</b>   | <b>\$75-99K</b>   | <b>≥\$100K</b> |
| <b>Ischemic stroke</b>        |                   |                   |                   |                   |                |
| Number of events              | 1259              | 500               | 259               | 296               | 427            |
| Person-time, years            | 142292.93         | 76591.78          | 44749.84          | 54799.23          | 99686.45       |
| Model 3                       | 0.94 (0.82, 1.07) | 0.88 (0.77, 1.01) | 0.89 (0.76, 1.05) | 0.95 (0.82, 1.1)  | 1 (ref)        |
| <b>Heart failure</b>          |                   |                   |                   |                   |                |
| Number of events              | 1773              | 788               | 393               | 420               | 526            |
| Person-time, years            | 129965.92         | 71840.46          | 41952.47          | 52046.71          | 95637.03       |
| Model 3                       | 1.16 (1.04, 1.3)  | 1.14 (1.01, 1.28) | 1.11 (0.97, 1.28) | 1.09 (0.95, 1.24) | 1 (ref)        |
| <b>Coronary Heart Disease</b> |                   |                   |                   |                   |                |
| Number of events              | 534               | 233               | 112               | 127               | 187            |
| Person-time, years            | 107509.59         | 56487.2           | 33121.23          | 41377.98          | 79008.85       |
| Model 3                       | 1.19 (0.97, 1.46) | 1.15 (0.93, 1.42) | 1.05 (0.82, 1.34) | 1.05 (0.83, 1.32) | 1 (ref)        |

Model 1 adjusted for age, sex, and race. Model 2 adjusted for baseline age, sex, education, hypertension, diabetes, and prevalent coronary heart disease, and heart failure. Model 3 adjusted for Model 2 covariates and chronic obstructive pulmonary disease and chronic kidney disease.

**Supplementary Table 2B.** Summary of events, person-time (years), and hazard ratios with 95% confidence intervals for cardiovascular events, by income category for study patients identified as black race.

|                               | <b>Income</b>     |                   |                   |                   |                |
|-------------------------------|-------------------|-------------------|-------------------|-------------------|----------------|
|                               | <b>&lt;\$40K</b>  | <b>\$40-59K</b>   | <b>\$60-74K</b>   | <b>\$75-99K</b>   | <b>≥\$100K</b> |
| <b>Ischemic stroke</b>        |                   |                   |                   |                   |                |
| Number of events              | 194               | 60                | 26                | 18                | 16             |
| Person-time, years            | 18236.15          | 7274.82           | 3721.5            | 3625.37           | 3936.07        |
| Model 3                       | 1.35 (0.77, 2.34) | 1.32 (0.74, 2.34) | 1.24 (0.66, 2.34) | 0.97 (0.49, 1.91) | 1 (ref)        |
| <b>Heart failure</b>          |                   |                   |                   |                   |                |
| Number of events              | 255               | 65                | 40                | 30                | 17             |
| Person-time, years            | 15033.21          | 6225.96           | 3206.78           | 3183.89           | 3417.46        |
| Model 3                       | 1.7 (1, 2.9)      | 1.36 (0.78, 2.37) | 1.82 (1.02, 3.26) | 1.53 (0.84, 2.8)  | 1 (ref)        |
| <b>Coronary Heart Disease</b> |                   |                   |                   |                   |                |
| Number of events              | 71                | 28                | 14                | 12                | 10             |
| Person-time, years            | 13716.85          | 5305.19           | 2657.36           | 2706.67           | 3037.36        |
| Model 3                       | 0.98 (0.47, 2.05) | 1.25 (0.58, 2.66) | 1.33 (0.58, 3.05) | 1.19 (0.51, 2.8)  | 1 (ref)        |

Model 1 adjusted for age, sex, and race. Model 2 adjusted for baseline age, sex, education, hypertension, diabetes, and prevalent coronary heart disease, and heart failure. Model 3 adjusted for Model 2 covariates and chronic obstructive pulmonary disease and chronic kidney disease.

**Supplementary Table 2C.** Summary of events, person-time (years), and hazard ratios with 95% confidence intervals for cardiovascular events, by income category for patients identified as Asian race.

|                               | <b>Income</b>     |                   |                   |                   |                |
|-------------------------------|-------------------|-------------------|-------------------|-------------------|----------------|
|                               | <b>&lt;\$40K</b>  | <b>\$40-59K</b>   | <b>\$60-74K</b>   | <b>\$75-99K</b>   | <b>≥\$100K</b> |
| <b>Ischemic stroke</b>        |                   |                   |                   |                   |                |
| Number of events              | 22                | 11                | 12                | 9                 | 18             |
| Person-time, years            | 2877.19           | 1696.39           | 1201.19           | 1471.29           | 3215.52        |
| Model 3                       | 0.92 (0.44, 1.93) | 0.95 (0.42, 2.13) | 1.51 (0.7, 3.26)  | 0.95 (0.42, 2.16) | 1 (ref)        |
| <b>Heart failure</b>          |                   |                   |                   |                   |                |
| Number of events              | 34                | 16                | 8                 | 14                | 13             |
| Person-time, years            | 2737.88           | 1620.85           | 1091.99           | 1398.16           | 3119.06        |
| Model 3                       | 1.57 (0.76, 3.23) | 1.53 (0.71, 3.3)  | 1.13 (0.46, 2.78) | 1.67 (0.77, 3.62) | 1 (ref)        |
| <b>Coronary Heart Disease</b> |                   |                   |                   |                   |                |
| Number of events              | 14                | 2                 | 3                 | 2                 | 6              |
| Person-time, years            | 2208.15           | 1360.82           | 850.5927447       | 1125.22           | 2577.98        |
| Model 3                       | 2.89 (0.88, 9.49) | 0.61 (0.11, 3.28) | 1.54 (0.37, 6.49) | 0.8 (0.16, 4.11)  | 1 (ref)        |

Model 1 adjusted for age, sex, and race. Model 2 adjusted for baseline age, sex, education, hypertension, diabetes, and prevalent coronary heart disease, and heart failure. Model 3 adjusted for Model 2 covariates and chronic obstructive pulmonary disease and chronic kidney disease.

**Supplementary Table 2D.** Summary of events, person-time (years), and hazard ratios with 95% confidence intervals for cardiovascular events, by income category for patients identified as Hispanic ethnicity.

|                               | <b>Income</b>     |                   |                   |                   |                |
|-------------------------------|-------------------|-------------------|-------------------|-------------------|----------------|
|                               | <b>&lt;\$40K</b>  | <b>\$40-59K</b>   | <b>\$60-74K</b>   | <b>\$75-99K</b>   | <b>≥\$100K</b> |
| <b>Ischemic stroke</b>        |                   |                   |                   |                   |                |
| Number of events              | 173               | 56                | 28                | 29                | 22             |
| Person-time, years            | 15301.07          | 7306.52           | 3594.9            | 3969.79           | 4995.24        |
| Model 3                       | 1.36 (0.84, 2.22) | 1.14 (0.68, 1.91) | 1.26 (0.71, 2.25) | 1.33 (0.76, 2.33) | 1 (ref)        |
| <b>Heart failure</b>          |                   |                   |                   |                   |                |
| Number of events              | 177               | 70                | 22                | 32                | 43             |
| Person-time, years            | 13298.54          | 6333.16           | 3336.58           | 3724.45           | 4632.15        |
| Model 3                       | 0.83 (0.57, 1.23) | 0.81 (0.54, 1.22) | 0.52 (0.31, 0.89) | 0.75 (0.47, 1.19) | 1 (ref)        |
| <b>Coronary Heart Disease</b> |                   |                   |                   |                   |                |
| Number of events              | 41                | 20                | 10                | 8                 | 10             |
| Person-time, years            | 11171.29          | 5337.82           | 2717.74           | 3065.16           | 3826.35        |
| Model 3                       | 0.85 (0.39, 1.86) | 0.96 (0.43, 2.17) | 1.05 (0.42, 2.59) | 0.79 (0.31, 2.03) | 1 (ref)        |

Model 1 adjusted for age, sex, and race. Model 2 adjusted for baseline age, sex, education, hypertension, diabetes, and prevalent coronary heart disease, and heart failure. Model 3 adjusted for Model 2 covariates and chronic obstructive pulmonary disease and chronic kidney disease.
